# Supplementary material for: Mild hydrothermal synthesis, structure and characterization of the vanadyl phosphate hydrate Pb(VOPO4)2·3H2O: the formation of spin dimers in a three dimensional crystal structure
Source: Royal Society of Chemistry journal article supplement (doi:10.1039/c2jm32976j), 2012-01-01
Supplement: c2jm32976j.pdf [file c2jm32976j.pdf]

Supporting information:

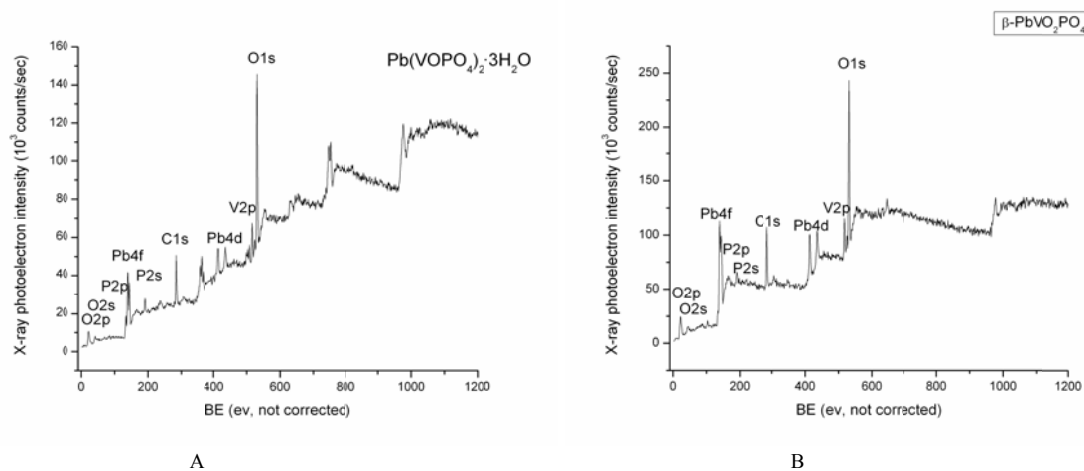

Figure S1. The wide scan spectra of XPS for  $\text{Pb}(\text{VOPO}_4)_2 \cdot 3\text{H}_2\text{O}$  (A) and  $\beta\text{-PbVO}_2\text{PO}_4$  (B)

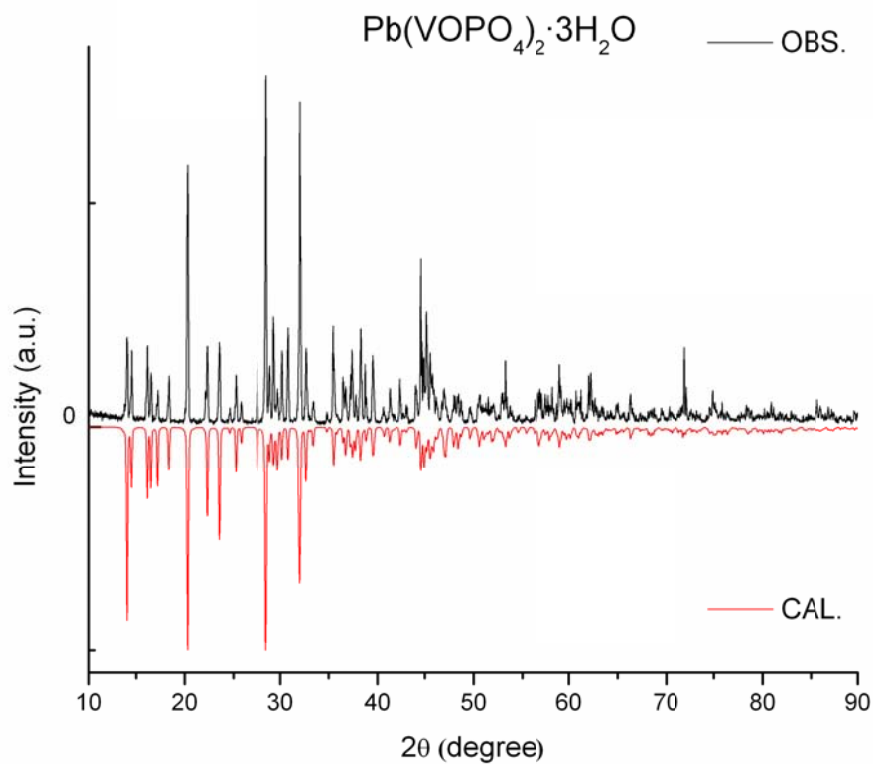

A

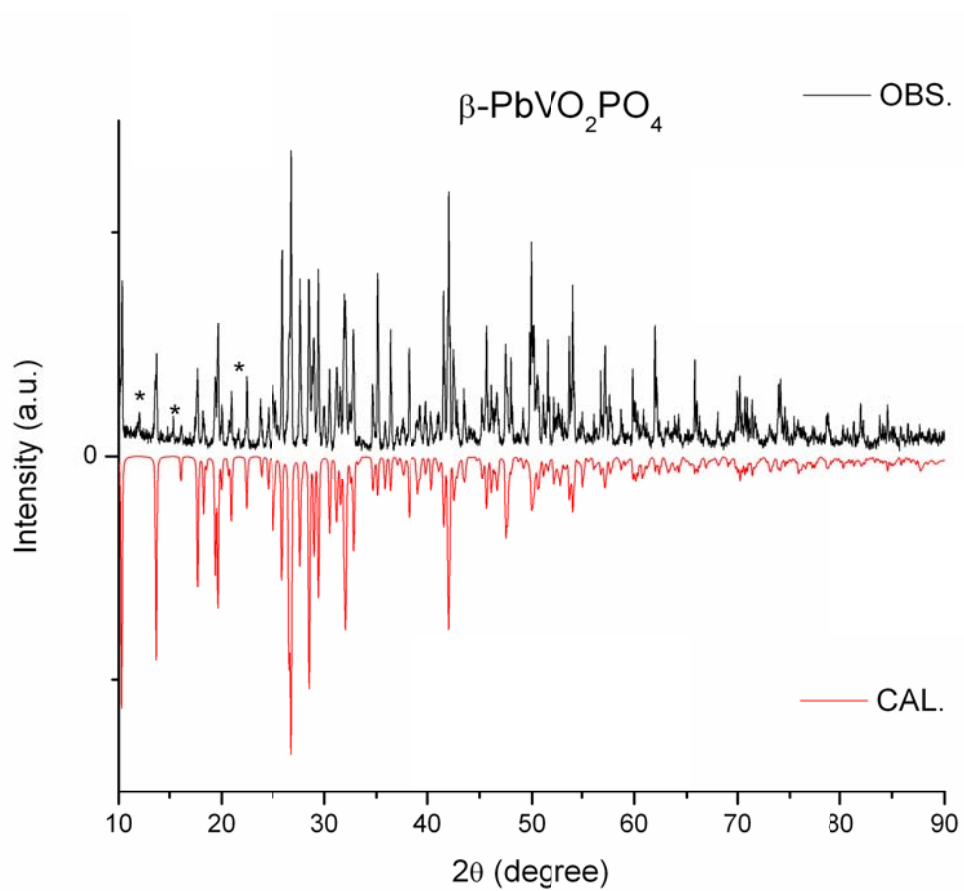

B

**Figure S2.** Powder XRD patterns for  $\text{Pb}(\text{VOPO}_4)_2 \cdot 3\text{H}_2\text{O}$  (A) and  $\beta\text{-PbVO}_2\text{PO}_4$  (B). Small peaks from the impurity marked as was observed between 10-20 two theta of the powder XRD pattern for  $\beta\text{-PbVO}_2\text{PO}_4$ .

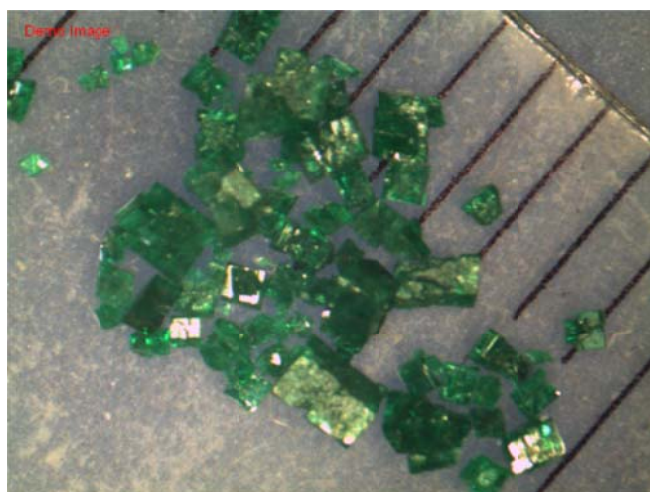

A

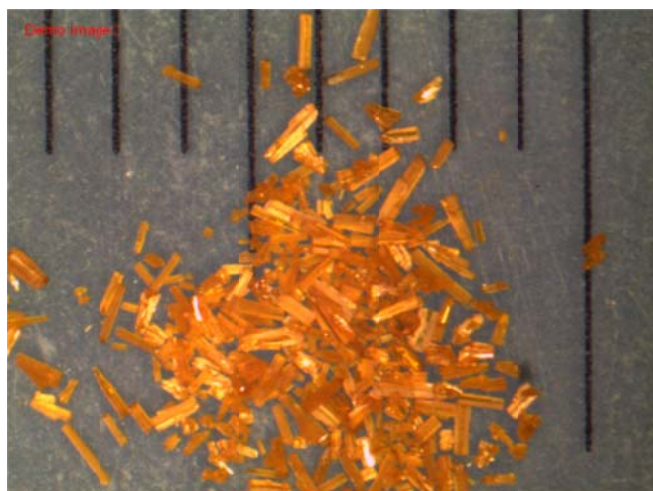

B

Figure S3. Microscope photos of  $\text{Pb}(\text{VOPO}_4)_2 \cdot 3\text{H}_2\text{O}$  (A) and  $\beta\text{-PbVO}_2\text{PO}_4$  (B) with the scale in mm.

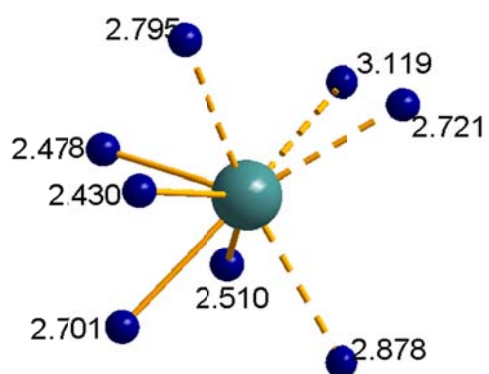

Figure S4. The coordination of oxygen atoms around Pb showing the stereoactivity of the lone pair.

**Magnetic data part:**

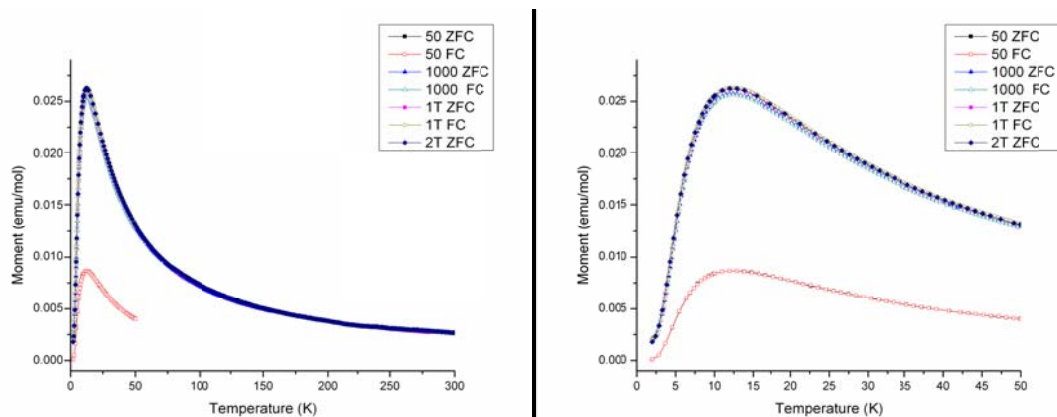

**Figure S5.** ZFC/FC curves recorded under different applied magnetic field.

The obvious difference between the ZFC/FC curves under 50 Oe with other ZFC/FC curves under higher field is due to the strong diamagnetic contribution (from the capsule and sample) at low field. The same reason for the slight lower of the ZFC/FC curves under 1000 Oe than curves under 1T and 2T. The Curves recorded at 1T and 2T was totally overlapped.

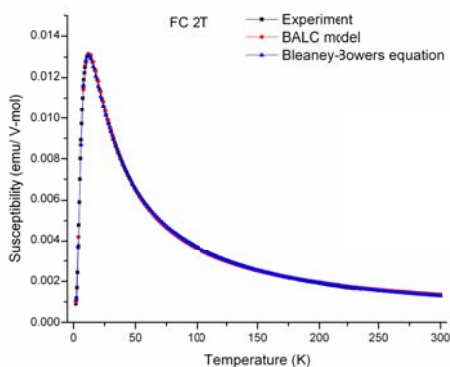

**Figure S6.** FC data recorded under the applied magnetic field 2T and was fit with BALC model and Bleaney-Bowers equation.

Use the FC data measured at 2T field with sweep mode. With BALC model, we were able to get a good fit yielding the alternating exchange coupling constant  $J_1 = -6.63 \text{ cm}^{-1}$ ,  $\alpha = 0.49$ ,  $g = 2.00$ ,  $\chi_0 = 9.34 \times 10^{-5} \text{ emu/V-mol}$ ,  $C_{\text{imp}} = 0.007 \text{ emu K/V-mol}$  and  $\Theta_{\text{imp}} = 0.74 \text{ K}$  with  $R^2 = 0.9998$ . Bleaney-Bowers equation provides a good fit yielding  $J = -6.95 \text{ cm}^{-1}$ ,  $g = 2.06$ , and  $J' = -5.55 \text{ K}$ ,  $\chi_0 = -8.19 \times 10^{-5} \text{ emu/V-mol}$ ,  $C_{\text{imp}} = 0.03 \text{ emu K/V-mol}$  and  $\Theta_{\text{imp}} = -25.5 \text{ K}$  with  $R^2 = 0.99974$ . Using equation (2) in the manuscript, the best refined  $n$  value was 1.38 and get the  $\Delta = 8.6 \text{ cm}^{-1}$  at final fitting with  $n = 1$ . The results are consistent well with the fit using data measured under 5000 Oe with step mode.

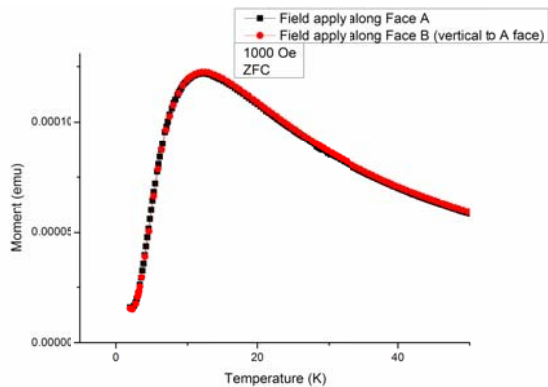

**Figure S7.** ZFC magnetic measurement (sweep model, 1K/min) applied on a single crystal along various direction A and B (B vertical to A). No mismatch was found, which implies the isotropic magnetic property.

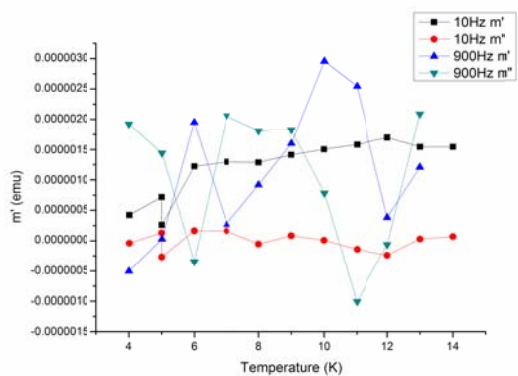

**Figure S8.** AC magnetic moment with 10Hz and 900Hz. The signal is weak with big noise. This measurement confirms the lack of long range order in the system.

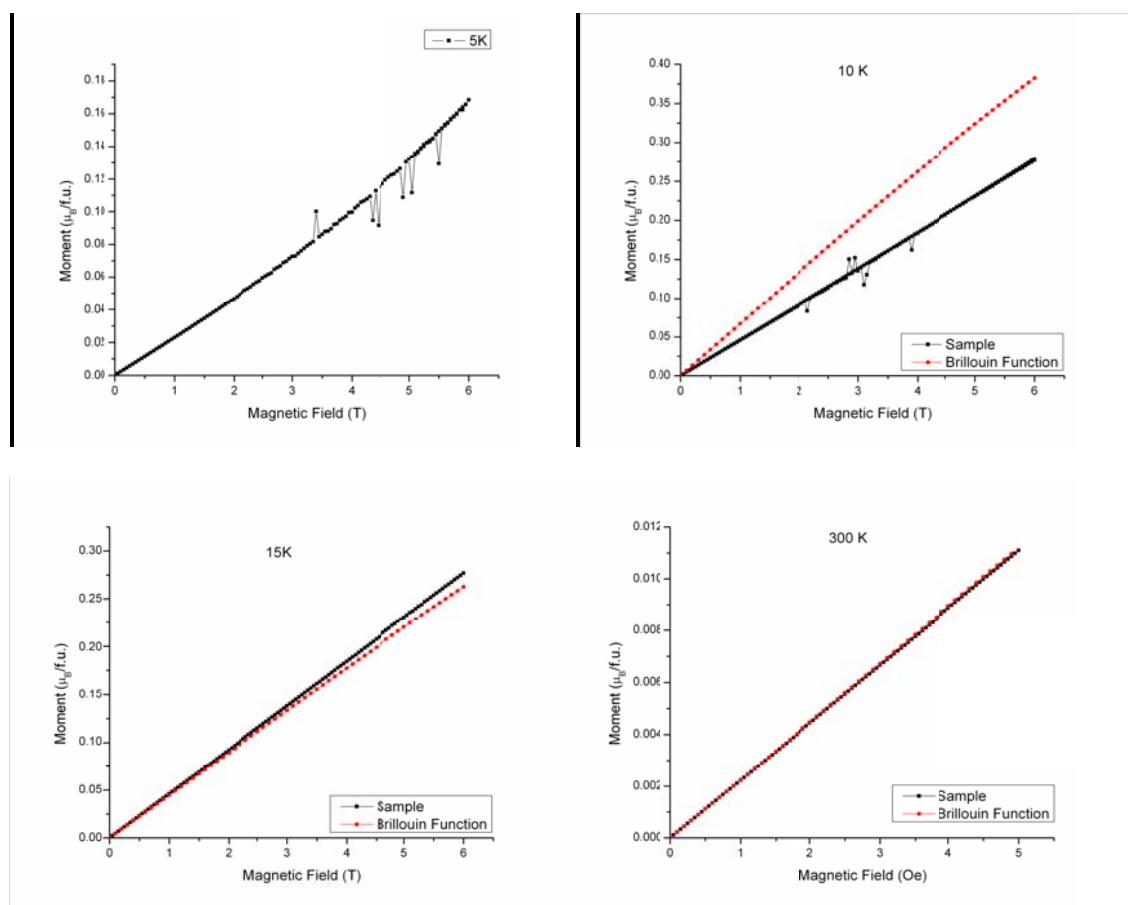

**Figure S9.** Isothermal magnetization measured between 0-6T applied field at 2K, 5K, 10K, 15K and 300K(0-5T).

**Table S1.** Exponents  $\zeta_i$  and Valence Shell Ionization Potentials  $H_{ii}$  of Slater-Type Orbitals  $\chi_i$  Used for Extended Hückel Tight-Binding Calculation<sup>a</sup>

| atom | $\chi_i$ | $H_{ii}(\text{eV})$ | $\zeta_i$ | $C^b$    | $\zeta_i'$ | $C'^b$   |
|------|----------|---------------------|-----------|----------|------------|----------|
| O    | 2s       | -32.299999          | 2.275000  | 1.00000  |            |          |
|      | 2p       | -14.800000          | 2.275000  | 1.00000  |            |          |
| V    | 4s       | -8.810000           | 1.300000  | 1.00000  |            |          |
|      | 4p       | -5.520000           | 1.300000  | 1.00000  |            |          |
|      | 3d       | -11.000000          | 4.750000  | 0.475500 | 1.700000   | 0.705200 |
| P    | 2s       | -18.600000          | 1.750000  | 1.00000  |            |          |
|      | 2p       | -14.000000          | 1.300000  | 1.00000  |            |          |

<sup>a</sup>  $H_{ii}$ 's are the diagonal matrix elements  $\langle \chi_i | H^{\text{eff}} | \chi_i \rangle$ , where  $H^{\text{eff}}$  is the effective Hamiltonian. In our calculations of the off-diagonal matrix elements  $H^{\text{eff}} = \langle \chi_i | H^{\text{eff}} | \chi_j \rangle$ , the weighted formula was used. Contraction coefficients used in the double- $\zeta$  Slater-type orbital.
